# Supplementary material for: One-step, solution-processed formamidinium lead trihalide (FAPbI(3−x)Clx) for mesoscopic perovskite–polymer solar cells
Source: Royal Society of Chemistry journal article supplement (doi:10.1039/c4cp02113d), 2014-01-01
Supplement: c4cp02113d2.pdf [file c4cp02113d2.pdf]

### Supplementary Information

#### **One-Step Solution-Processed Formamidinium Lead Trihalide ( $FAPbI_{3-x}Cl_x$ ) for Mesoscopic Perovskite-Polymer Solar Cells**

Siliu Lv,<sup>a</sup> Shuping Pang,<sup>a,\*</sup> Yuanyuan Zhou,<sup>b</sup> Nitin P. Padture,<sup>b</sup> Hao Hu,<sup>a</sup> Li Wang,<sup>c</sup> Xinhong Zhou,<sup>c</sup>  
Huimin Zhu,<sup>a</sup> Lixue Zhang,<sup>a</sup> Changshui Huang,<sup>a</sup> and Guanglei Cui<sup>a,\*</sup>

<sup>a</sup> Qingdao Institute of Bioenergy and Bioprocess Technology, Chinese Academy of Sciences,  
Qingdao 266101, P.R. China.

<sup>b</sup> School of Engineering, Brown University, Providence, RI 02912, USA.

<sup>c</sup> Qingdao University of Science and Technology, Qingdao 266042, P.R. China.

\* Corresponding authors. *Email address:* pangsp@qibebt.ac.cn; cuigl@qibebt.ac.cn

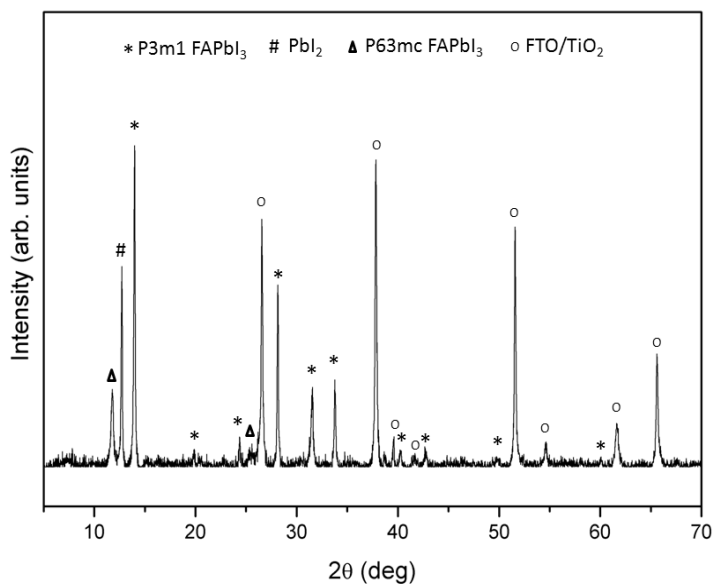

**Figure S1.** XRD pattern of the reference  $FAPbI_3$  layer prepared from a mixture of  $PbI_2$  and  $FAl$  in 1:1 molar ratio 1:1, on mesoporous  $TiO_2$ , heat-treated at 160 °C for 30 min.

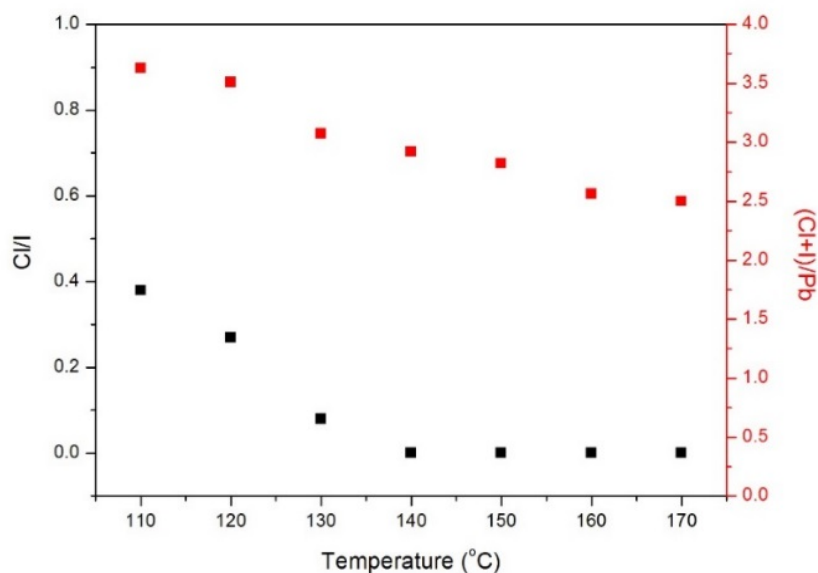

**Figure S2.** The mole ratios of Cl/I and (Cl+I)/Pb as function of annealing temperature (30 min) in as-prepared perovskite films upon mesoporous TiO<sub>2</sub> based on EDS elemental analysis. It is clear that the amount of the Cl gradually decreases with increasing heat-treatment temperature. When the perovskite film was heated at 110 °C for 30 min, the amount of Cl is similar to its initial content (Cl/I mole ratio 0.4), indicating that significant evaporation /sublimation of *FACl* occurs at 110 °C to 120 °C.

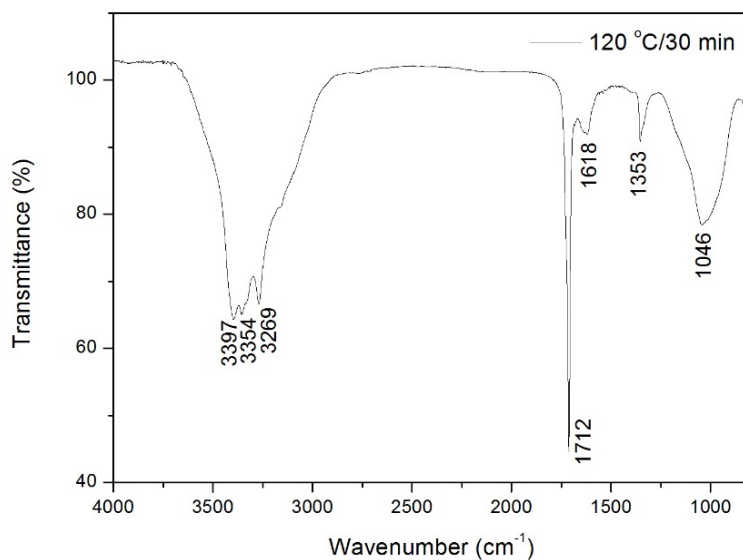

**Figure S3.** FTIR spectrum of the perovskite film heated at 120 °C for 30 min. The absorbance at 1712 cm<sup>-1</sup> is attributed to the C=O stretching vibration, indicating the presence of DMF.

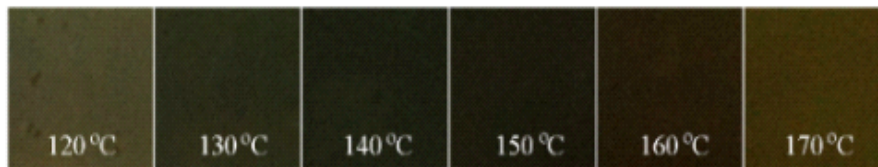

**Figure S4.** Optical photographs of  $FAPbI_{(3-x)}Cl_x$  layers, on mesoporous  $TiO_2$ , heat-treated at 120 °C to 170 °C (30 min).

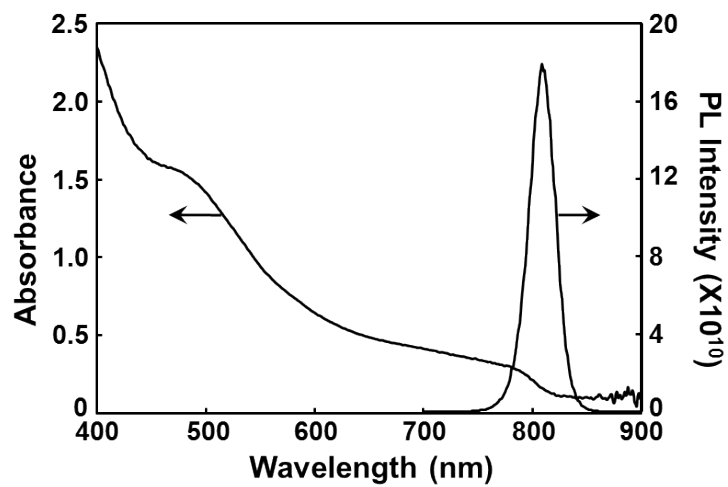

**Figure S5.** UV-*vis*-NIR optical absorption spectrum and photoluminescence (PL) emission spectrum from  $FAPbI_{(3-x)}Cl_x$  perovskite layer (140 °C heat-treatment, 30 min).
